# Supplementary material for: G-Quadruplex-based DNAzyme for colorimetric detection ofcocaine: Using magnetic nanoparticles as the separation and amplification element
Source: Royal Society of Chemistry journal article supplement (doi:10.1039/c0an00557f), 2010-11-16
Supplement: c0an00557f.pdf [file c0an00557f.pdf]

## Supporting Information

### **G-Quadruplex-based DNAzyme for colorimetric detection of cocaine:**

### **Using magnetic nanoparticles as separation and amplification element**

**Yan Du<sup>a,b</sup>, Bingling Li<sup>a,b</sup>, Shaojun Guo<sup>a,b</sup>, Zhixue Zhou<sup>a,b</sup>, Ming Zhou<sup>a,b</sup>, Erkang Wang<sup>\*a</sup> and Shaojun Dong<sup>\*a</sup>**

*<sup>a</sup> State Key Laboratory of Electroanalytical Chemistry, Changchun Institute of Applied Chemistry, Chinese Academy of Sciences, Changchun, Jilin, 130022, P. R. China; <sup>b</sup> Graduate School of the Chinese Academy of Sciences, Beijing 100039, P. R. China. <sup>b</sup> Graduate School of the Chinese Academy of Sciences, Beijing, 100039, P. R. China*

E-mail: [dongsj@ciac.jl.cn](mailto:dongsj@ciac.jl.cn); [ekwang@ciac.jl.cn](mailto:ekwang@ciac.jl.cn)

**Table S1** DNA sequences used.

| DNAs used |                                                        |
|-----------|--------------------------------------------------------|
| C1-AG4    | 5'-TGGGTAGGGCGGGTTGGGAAATTCGTTCTTCAATGAAGTGGGACGACA-3' |
| SH-C2     | 5'-TTTTTGGGAGTCAAGAACGAA-3'                            |

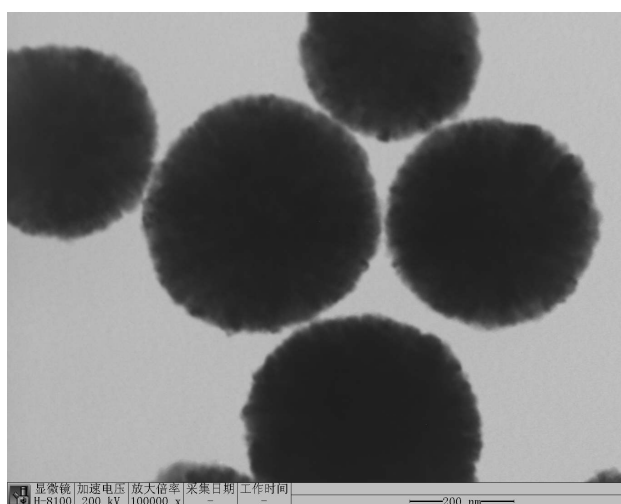

**Figure S1** TEM image of amine-functionalized  $\text{Fe}_3\text{O}_4$  nanoparticles ( $\text{MNPs-NH}_2$ ), which had a relatively smooth surface and an average diameter of about 400 nm. The prepared  $\text{MNPs-NH}_2$  also showed a good monodispersity in water solution.
